# Supplementary material for: VR-FOCUS: Investigating eye tracking during a virtual reality N-back task as a predictor of cognitive load in chronic pain
Source: Research Square preprint supplement (doi:10.21203/rs.3.rs-8680786/v1), 2026-02-09
Supplement: Supplementary file 1 [file e24fb0df949657044bdd1d3e.docx]

**Table 3: Between-group comparison of participant baseline characteristics**

| **Characteristics** | **p-value*** |
| --- | --- |
| Age | <0.001 |
| Gender | 0.314 |
| Ethnicity | 0.013 |
| Education level | <0.001 |
| Previous VR Exposure | 0.011 |
| Number of Medical Conditions | <0.001 |
| Number of Regular Medications | <0.001 |

*An independent samples t-test was used for significance testing related to mean difference in age. Chi-squared tests were used in all other comparisons.

**Table 4: Between-group comparison of performance indices**

| **Performance measure** | **p-value*** | **Effect size (rank-biserial correlation)** |
| --- | --- | --- |
| Number of “Hits” |  |  |
| 1-Back task | <0.001 | 0.461 |
| 2-Back task | <0.001 | 0.419 |
| 3-Back task | 0.079 | 0.220 |
| 4-Back task | 0.178 | 0.168 |
| Discrimination index (d’) |  |  |
| 1-Back task | <0.001 | 0.461 |
| 2-Back task | 0.002 | 0.402 |
| 3-Back task | 0.457 | 0.095 |
| 4-Back task | 0.039 | 0.262 |
| Response bias (c) |  |  |
| 1-Back task | <0.001 | 0.461 |
| 2-Back task | 0.004 | 0.369 |
| 3-Back task | 0.600 | 0.239 |
| 4-Back task | 0.737 | 0.043 |

*****Mann–Whitney U test used throughout due to non-normal data.

**Table 5: Between-group comparison of NASA-TLX total scores and perceived difficulty maintaining task focus**

| **Performance measure** | **p-value*** | **Effect size (rank-biserial correlation)** |
| --- | --- | --- |
| NASA-TLX total score |  |  |
| Baseline task | 0.166 | 0.171 |
| 1-Back task | 0.093 | 0.213 |
| 2-Back task | 0.070 | 0.230 |
| 3-Back task | 0.058 | 0.240 |
| 4-Back task | 0.005 | 0.357 |
| Difficulty maintaining focus on task |  |  |
| Baseline task | 0.590 | 0.069 |
| 1-Back task | 0.055 | 0.243 |
| 2-Back task | 0.050 | 0.248 |
| 3-Back task | 0.037 | 0.265 |
| 4-Back task | 0.008 | 0.338 |

*****Mann–Whitney U test used throughout due to non-normal data.

**Table 6: Classifier accuracy and 95% confidence interval metrics for 1-Back and 4-Back class labels with left pupil size as signal input.**

|  | **Accuracy** | | **95% Confidence Intervals*** | |
| --- | --- | --- | --- | --- |
| **Classifier** | HC | CP | HC | CP |
| ROCKET | 0.87 | 0.65 | 0.78, 0.93 | 0.54, 0.74 |
| HIVE COTE 2.0 | 0.83 | 0.61 | 0.74, 0.90 | 0.50, 0.70 |
| DrCIF | 0.85 | 0.65 | 0.77, 0.92 | 0.55, 0.76 |
| Rotation Forest | 0.82 | 0.60 | 0.73, 0.89 | 0.49, 0.69 |
| Quant | 0.71 | 0.56 | 0.61, 0.80 | 0.45, 0.66 |

*Wilson 95% CIs used.
